# Supplementary material
Source: publisher figshare collection journal article supplement (https://sage.figshare.com/ndownloader/files/13569161)
Supplement: Supplementary file 1 [file 13569161]

## **Online Supplement**

Solomon, B. G., Dawes, J.M., Duhon, G. J., Poncy, B. C. (2018). False Discovery Rates When Engaging in Skill vs. Performance Deficit Analysis For Academic Instructional Planning. *Assessment for Effective Intervention*.

## **Table of Contents**

P. 2. References for articles included in the calculation of the base rate for performance deficits.

P. 4. Table S1 - Descriptives for articles reviewed in the calculation of the base rate.

References for articles included in the calculation of the base rate for performance deficits.

Andersen, M. N., Daly, E. J., III, & Young, N. D. (2013). Examination of a one-trial brief experimental analysis to identify reading fluency interventions. *Psychology in the Schools, 50*, 403-414. doi: 10.1002/pits.21682

Begeny, J. C., Daly, E. J., & Vallely, R. J. (2006). Improving oral reading fluency through response opportunities: A comparison of phrase drill error correction with repeated readings. *Journal of Behavioral Education, 15*, 229-235.

Burns, M. K., Ganuza, Z. M., & London, R. M. (2009). Brief experimental analysis of written letter formation: single-case demonstration. *Journal of Behavioral Education, 18*, 2-34.

Daly E. J, III, Martens B. K, Dool E. J, & Hintze J. M. (1998). Using brief functional analysis to select interventions for oral reading. *Journal of Behavioral Education, 8*, 203–218.

Daly E. J, III, Martens B. K, Hamler K. R, Dool E. J, & Eckert T. L. (1999). A brief experimental analysis for identifying instructional components needed to improve oral reading fluency. *Journal of Applied Behavior Analysis, 32*, 83–94.

Daly E. J, III, Persampieri M. J., McCurdy M., Gortmaker V. J. (2005). Generating reading interventions through experimental analysis of academic skills: Demonstration and empirical evaluation. *School Psychology Review, 34*, 395–414.

Duhon, G. J., Noell, G. H., Witt, J. C., Freeland, J. T., Dufrene, B. A., & Gilbertson, D. N. (2004). Identifying academic skill and performance deficits: the experimental analysis of brief assessments of academic skills. *School Psychology Review, 33*, 429-443.

- Eckert, T. L., Ardoin, S. P., Daisey, D. M., & Scarola, M. D. (2000). Empirically evaluating the effectiveness of reading interventions: the use of brief experimental analysis and single case designs. *Psychology in the Schools, 37*, 463-473.
- Gilbertson, D., Witt, J., Duhon, G., & Dufrene, B. (2008). Using brief assessments to select math fluency and on-task behavior interventions: An investigation of treatment utility. *Education & Treatment of Children, 31*, 167-181.
- Jones, K. M., & Wickstrom, K. F. (2002). Done in sixty seconds: further analysis of the brief assessment model for academic problems. *School Psychology Review, 31*, 554-568.
- Malloy, K. J., Gilbertson, D., Maxfield, J. (2007). Use of brief experimental analysis for selecting reading interventions for English language learners. *School Psychology Review, 36*, 291-310.
- McCurdy, M., Daly, E. J., III, Gortmaker, V., Bonfiglio, C., & Persampieri, M. (2007). Use of brief instructional trials to identify small group reading strategies: a two experiment study. *Journal of Behavioral Education, 16*, 7-26.
- Noell, G. H., Freeland, J. T., Witt, J. C., & Gansle, K. A. (2001). Using brief assessments to identify effective interventions for individual students. *Journal of School Psychology, 39*, 335-355.
- Parker, D. C., Dickey, B. N., Burns, M. K., McMaster, K. L. (2012). An application of brief experimental analysis with early writing. *Journal of Behavioral Education, 21*, 329-349.
- Wilber, A., & Cushman, T. P. (2005). Selecting effective academic interventions: an example using brief experimental analysis for oral reading. *Psychology in the Schools, 43*, 79-84.

Reisener, C. D., Dufrene, B. A., Clark, C. R., Olmi, D. J., & Tingstrom, D. H. (2016). Selecting effective interventions to increase math computation fluency via brief experimental analysis. *Psychology in the Schools, 53*, 39-57.

Rich, S. E., & Duhon, G. J. (2014). Using brief academic assessments to determine generalization strategies. *Journal of Behavioral Education, 23*, 401-420.

Table S1

*Descriptives for Articles Reviewed in the Calculation of the Base Rate*

| Authors                                        | N | PD% | BEA Design             |
|------------------------------------------------|---|-----|------------------------|
| Andersen, Daly, & Young (2013)                 | 6 | 0   | Two Demonstrations     |
| Begeny, Daly, & Vallely (2006)                 | 1 | 0   | Alternating Treatments |
| Burns, Ganuza, & London (2009)                 | 1 | 0   | Two Demonstrations     |
| Daly, Martens, Dool, & Hintze (1998)           | 3 | 0   | Two Demonstrations     |
| Daly et al. (1999)                             | 4 | 0   | Two Demonstrations     |
| Daly, Persampieri, McCurdy, & Gortmaker (2005) | 2 | 50  | One Demonstration      |
| Duhon et al. (2004)                            |   |     |                        |
| - Study 1                                      | 1 | 0   | One Demonstration      |
| - Study 2                                      | 3 | 67  | Alternating Treatments |
| Eckert, Ardoin, Daisey, & Scarola (2000)       | 4 | 0   | Alternating Treatments |
| Gilbertson, Witt, Duhon, & Dufrene (2008)      | 4 | 0   | One Demonstration      |
| Jones & Wickstrom (2002)                       | 5 | 0   | Two Demonstrations     |
| Malloy, Gilbertson, & Maxfield (2007)          |   |     |                        |
| - DV 1                                         | 5 | 40  | Two Demonstrations     |
| - DV 2                                         | 5 | 20  | Two Demonstrations     |
| McCurdy et al. (2007)                          |   |     |                        |
| - DV 1                                         | 4 | 0   | Two Demonstrations     |
| - DV 2                                         | 4 | 25  | Two Demonstrations     |
| Noell, Freeland, Witt, & Gansle (2001)         |   |     |                        |
| - DV 1                                         | 4 | 25  | Two Demonstrations     |
| - DV 2                                         | 4 | 0   | Two Demonstrations     |
| Parker, Dickey, Burns, & McMaster (2012)       | 3 | 33  | Two Demonstrations     |
| Reisener et al. (2016)                         | 8 | 0   | Two Demonstrations     |
| Rich & Duhon (2014)                            | 6 | 0   | One Demonstration      |
| Wilber & Cushman (2006)                        | 1 | 0   | One Demonstration      |

*Note.* PD% = Percentage of Identified Performance Deficits, BEA = Brief Experimental Analysis, DV = Dependent Variable.
